# Supplementary material for: Mechanism of Action of Thalassospiramides, A New Class of Calpain Inhibitors
Source: PubMed Central journal article supplement (PMC4350077; doi:10.1038/srep08783), 2015-03-05
Supplement: srep08783-s1.pdf [file srep08783-s1.pdf]

# Supporting information

## Mechanism of Action of Thalassospiramides, A New Class of Calpain Inhibitors

Liang Lu,<sup>1</sup> Michael J. Meehan,<sup>2</sup> Shuo Gu,<sup>3</sup> Zhilong Chen,<sup>3</sup> Weipeng Zhang,<sup>1</sup> Gen Zhang,<sup>1</sup> Lingli Liu,<sup>1</sup> Xuhui Huang,<sup>3</sup> Pieter C. Dorrestein,<sup>2,4,5</sup> Ying Xu,<sup>\*,1,6</sup> Bradley S. Moore,<sup>\*,2,5</sup> Pei-Yuan Qian<sup>\*,1</sup>

<sup>1</sup> KAUST Global Collaborative Research, Division of Life Science, School of Science, Hong Kong University of Science and Technology, Clear Water Bay, Hong Kong, China

<sup>2</sup> Skaggs School of Pharmacy & Pharmaceutical Sciences, University of California at San Diego, La Jolla, California 92037, United States

<sup>3</sup> Department of Chemistry, Hong Kong University of Science and Technology, Clear Water Bay, Hong Kong, China

<sup>4</sup> Department of Pharmacology, University of California at San Diego, La Jolla, California 92037, United States

<sup>5</sup> Center for Marine Biotechnology and Biomedicine, Scripps Institution of Oceanography, University of California at San Diego, La Jolla, California 92037, United States

<sup>6</sup> School of Life Science, Shenzhen University, Nanhai Ave 3688, Shenzhen, Guangdong Province, 518060, China

\* Correspondence should be addressed to P.Y.Qian (boqianpy@ust.hk), B. Moore (bsmoore@ucsd.edu) or Y. Xu (boxuying@szu.edu.cn).

## Table of contents

### Supplementary Figures

**Supplementary Fig. 1:** MS/MS analysis of peak 3097.5 (peptide 105-133) by MALDI-TOF/TOF.

**Supplementary Fig. 2:** Sequence alignment of human calpain 1 and two expressed proteins in *E.coli*.

**Supplementary Fig. 3:** SDS-PAGE of  $\mu$ I-II and  $\mu$ I-IIC115A.

**Supplementary Fig. 4:** Identification of  $\mu$ I-II by MS/MS annotation with LC-HR-MS/MS (qTOF).

**Supplementary Fig. 5:** Identification of  $\mu$ I-IIC115A by MS/MS annotation with LC-HR-MS/MS (qTOF).

**Supplementary Fig. 6:** MS/MS annotation of  $\beta$ -ME modified peptides in  $\mu$ I-II by FT-ICR-MS.

**Supplementary Fig. 7:** FT-ICR-MS data comparison of  $\mu$ I-II and  $\mu$ I-IIC115A samples.

**Supplementary Fig. 8:** MS/MS annotation of **1**-modified peptide by HR-MS/MS (qTOF).

**Supplementary Fig. 9:** Representative pose of **4** (thalassospiramide C) in the calpain model.

**Supplementary Fig. 10:** Characterization of **1** by HRMS and  $^1\text{H}$  NMR.

**Supplementary Fig. 11:** Characterization of **2** by HRMS and  $\text{MS}^n$ .

**Supplementary Fig. 12:** Characterization of **3** by HRMS and  $\text{MS}^n$ .

**Supplementary Fig. 13:** Characterization of **4** by HRMS and H-NMR.

### Supplementary Table

**Supplementary Table 1:** Docking results for the representative thalassospiramides.

## Supplementary Figures

TDICQGalGDC(115)WLLAAIASLTLNDTLLHR

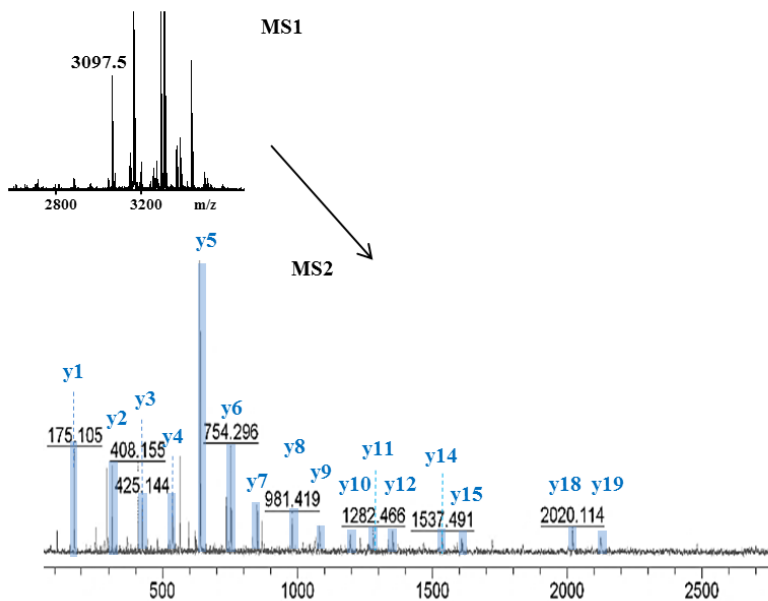

| Species | Cal. mass | Obs. mass | Error (Da) |
|---------|-----------|-----------|------------|
| y1      | 175.12    | 175.11    | 0.01       |
| y2      | 312.18    | 312.11    | 0.07       |
| y3      | 425.26    | 425.14    | 0.12       |
| y4      | 538.35    | 538.21    | 0.14       |
| y5      | 639.39    | 639.27    | 0.12       |
| y6      | 754.42    | 754.30    | 0.12       |
| y7      | 868.46    | 868.35    | 0.11       |
| y8      | 981.55    | 981.42    | 0.13       |
| y9      | 1082.6    | 1082.5    | 0.1        |
| y10     | 1195.7    | 1195.6    | 0.1        |
| y11     | 1282.7    | 1282.5    | 0.2        |
| y12     | 1353.8    | 1353.6    | 0.2        |
| y14     | 1537.9    | 1537.5    | 0.4        |
| y15     | 1608.9    | 1608.6    | 0.3        |
| y18     | 2021.2    | 2021.1    | 0.1        |
| y19     | 2124.2    | 2124.0    | 0.2        |

**Supplementary Fig. 1** | MS/MS analysis of peak 3097.5 (peptide105-133) by MALDI-TOF/TOF (LIFT mode).

|                 |                                                                |
|-----------------|----------------------------------------------------------------|
| μI-II           | MGSSHHHHHSSGLVPRGSHMASMTGGQQMGRGSGRHENAIKYLGDYEQLRVRLQSGT      |
| μI-IIC115A      | MGSSHHHHHSSGLVPRGSHMASMTGGQQMGRGSGRHENAIKYLGDYEQLRVRLQSGT      |
| Human calpain 1 | GRHENAIKYLGDYEQLRVRLQSGT                                       |
| μI-II           | LFRDEAFPPVPQSLGYKDLGNSSKTYGIKWKRPTELLSNPQFIVDGATRTRDQCQALGD    |
| μI-IIC115A      | LFRDEAFPPVPQSLGYKDLGNSSKTYGIKWKRPTELLSNPQFIVDGATRTRDQCQALGD    |
| Human calpain 1 | LFRDEAFPPVPQSLGYKDLGNSSKTYGIKWKRPTELLSNPQFIVDGATRTRDQCQALGD    |
| μI-II           | CWLLAAIASLTLNDTLLHRVVPHGQSFQNGYAGIFHFQLWQFGWVDVVVDDLLPIKD GK   |
| μI-IIC115A      | AWLLAAIASLTLNDTLLHRVVPHGQSFQNGYAGIFHFQLWQFGWVDVVVDDLLPIKD GK   |
| Human calpain 1 | CWLLAAIASLTLNDTLLHRVVPHGQSFQNGYAGIFHFQLWQFGWVDVVVDDLLPIKD GK   |
| μI-II           | LVFVHSAEGNEFWSALLEKAYAKVNGSYEALSGGSTSEGFEDFTGGVTEWYELRKAPSDL   |
| μI-IIC115A      | LVFVHSAEGNEFWSALLEKAYAKVNGSYEALSGGSTSEGFEDFTGGVTEWYELRKAPSDL   |
| Human calpain 1 | LVFVHSAEGNEFWSALLEKAYAKVNGSYEALSGGSTSEGFEDFTGGVTEWYELRKAPSDL   |
| μI-II           | YQIILKALERGSLLGCSIDISSVLDMEAITFKKLVKGHAYSVTGAKQVNYRGQVVS LIRM  |
| μI-IIC115A      | YQIILKALERGSLLGCSIDISSVLDMEAITFKKLVKGHAYSVTGAKQVNYRGQVVS LIRM  |
| Human calpain 1 | YQIILKALERGSLLGCSIDISSVLDMEAITFKKLVKGHAYSVTGAKQVNYRGQVVS LIRM  |
| μI-II           | RNPWGEVEWTGAWS DSSSEWNNVDPYERDQLRVK MEDGEFWMSFRDFMREFTRLEICNLT |
| μI-IIC115A      | RNPWGEVEWTGAWS DSSSEWNNVDPYERDQLRVK MEDGEFWMSFRDFMREFTRLEICNLT |
| Human calpain 1 | RNPWGEVEWTGAWS DSSSEWNNVDPYERDQLRVK MEDGEFWMSFRDFMREFTRLEICNLT |
| μI-II           | PDLDKLAAALEHHHHHHH                                             |
| μI-IIC115A      | PDLDKLAAALEHHHHHHH                                             |
| Human calpain 1 | PD                                                             |

**Supplementary Fig. 2** | Sequence alignment of human calpain 1 and two expressed proteins. The sequence of human calpain 1 was downloaded from *pubmed* (accession: 2ARY\_A). For μI-IIC115A protein, the active site Cys115 was mutated to Ala (marked in red).

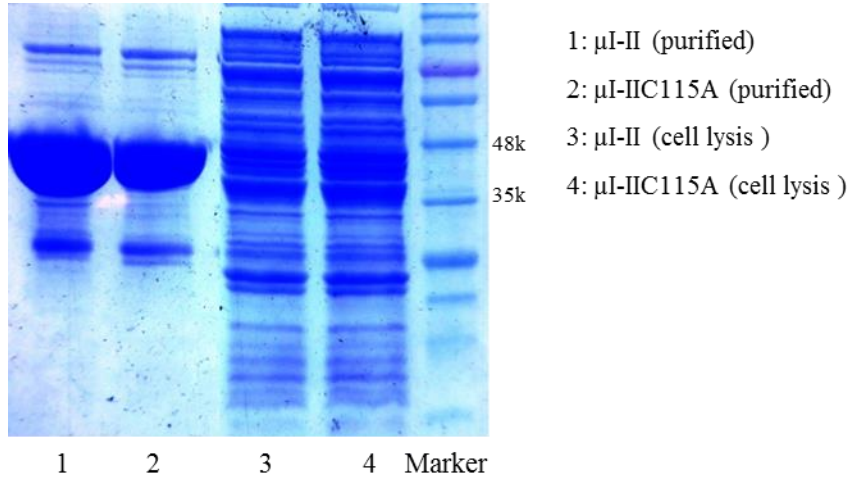

**Supplementary Fig. 3** | SDS-PAGE of  $\mu$ I-II and  $\mu$ I-IIC115A protein (purified/ in the cell lysis).

## A.

AA sequence coverage of  $\mu$ I-II:

GSSHHHHHSSGLVPRGSHMASMTGGQQMGRGSGRHENAIK~~Y~~LGQDYEQLRVRCLQSGTLFRDEAFPPVPQSLGY  
 KDLGPNSSKTYGIKWKRPTTELLSNPQFIVDGATR~~T~~DICQGALGDC(115)WLLAAIASLTLNDTLLHRVVPHGQSFQNG  
 YAGIFHFQLWQFGEWVDVVDDLLPIKD~~G~~KL~~V~~FVHSAEGNEFWSALLEKAYAKVNGSYEALSGGSTSEGFEDFTG  
 GVTEWYELRKAPSDLYQIILKALERGSLLGCSIDISSVLDMEAITFK~~L~~VKGHAYSVTGAKQVNYRGQVVS~~L~~IRMRN  
 PWGEVEWTGAWS~~S~~SEWNNVDPYERDQLRVK~~M~~EDGEFWMSFRDFMREFTRLEICNLTPDL~~D~~KLAAALEHHHHH  
 H

| Start | End | Amino acid sequence                             | Charge | Cal. Mass | Obs. Mass | Error(Da) |
|-------|-----|-------------------------------------------------|--------|-----------|-----------|-----------|
| 17    | 31  | (R) GSHMASMTGGQQMGR(G)                          | 3      | 512.56    | 512.56    | 0.00      |
| 17    | 31  | (R) GSHMASMTGGQQMGR(G)                          | 2      | 768.33    | 768.33    | 0.00      |
| 42    | 51  | (K) YLGQDYEQLR(V)                               | 2      | 642.82    | 642.82    | 0.00      |
| 54    | 62  | (R) CLQSGTLFR(D)                                | 2      | 512.77    | 512.77    | 0.00      |
| 63    | 76  | (R) DEAFPPVPQSLGYK(D)                           | 3      | 516.60    | 516.60    | 0.00      |
| 63    | 76  | (R) DEAFPPVPQSLGYK(D)                           | 2      | 774.39    | 774.40    | -0.01     |
| 85    | 89  | (K) TYGIK(W)                                    | 2      | 291.17    | 291.17    | 0.00      |
| 85    | 89  | (K) TYGIK(W)                                    | 1      | 581.33    | 581.33    | 0.00      |
| 92    | 109 | (K) RPTTELLSNPQFIVDGATR(T)                      | 3      | 672.03    | 672.03    | 0.00      |
| 110   | 138 | (R) TDICQGALGDCWLLAAIASLTLNDTLLHR(V)            | 3      | 1033.2    | 1033.2    | 0.0       |
| 139   | 176 | (R)<br>VVPHGQSFQNGYAGIFHFQLWQFGEWVDVVDDLLPIK(D) | 4      | 1097.1    | 1097.1    | 0.0       |
| 180   | 198 | (K) LVFVHSAEGNEFWSALLEK(A)                      | 3      | 726.04    | 726.05    | -0.01     |
| 203   | 233 | (K) VNGSYEALSGGSTSEGFEDFTGGVTEWYELR(K)          | 4      | 836.88    | 836.88    | 0.00      |
| 203   | 233 | (K) VNGSYEALSGGSTSEGFEDFTGGVTEWYELR(K)          | 3      | 1115.5    | 1115.5    | 0.0       |
| 235   | 245 | (K) APSDLYQIILK(A)                              | 2      | 630.86    | 630.87    | -0.01     |
| 250   | 271 | (R) GSSLGCSIDISSVLDMEAITFK(K)                   | 3      | 767.06    | 767.06    | 0.00      |
| 291   | 298 | (R) GQVVS <del>L</del> IR(M)                    | 2      | 436.27    | 436.28    | -0.01     |
| 301   | 327 | (R) NPWGEVEWTGAWS <del>S</del> SEWNNVDPYER(D)   | 4      | 800.09    | 800.10    | -0.01     |
| 301   | 327 | (R) NPWGEVEWTGAWS <del>S</del> SEWNNVDPYER(D)   | 3      | 1066.5    | 1066.5    | 0.0       |
| 334   | 344 | (K) MEDGEFWMSFR(D)                              | 2      | 717.80    | 717.80    | 0.00      |
| 353   | 364 | (R) LEICNLTPDL <del>D</del> KL(L)               | 2      | 687.35    | 687.36    | -0.01     |

**Supplementary Fig. 4** | Identification of  $\mu$ I-II by MS/MS annotation with LC-HR-MS/MS (qTOF). A) Amino acid sequence coverage of  $\mu$ I-II and m/z's of all tryptic peptides verified by MS<sup>2</sup>.

## B.

TDICQGALGDCWLLAAIASLTLNDTLLHR

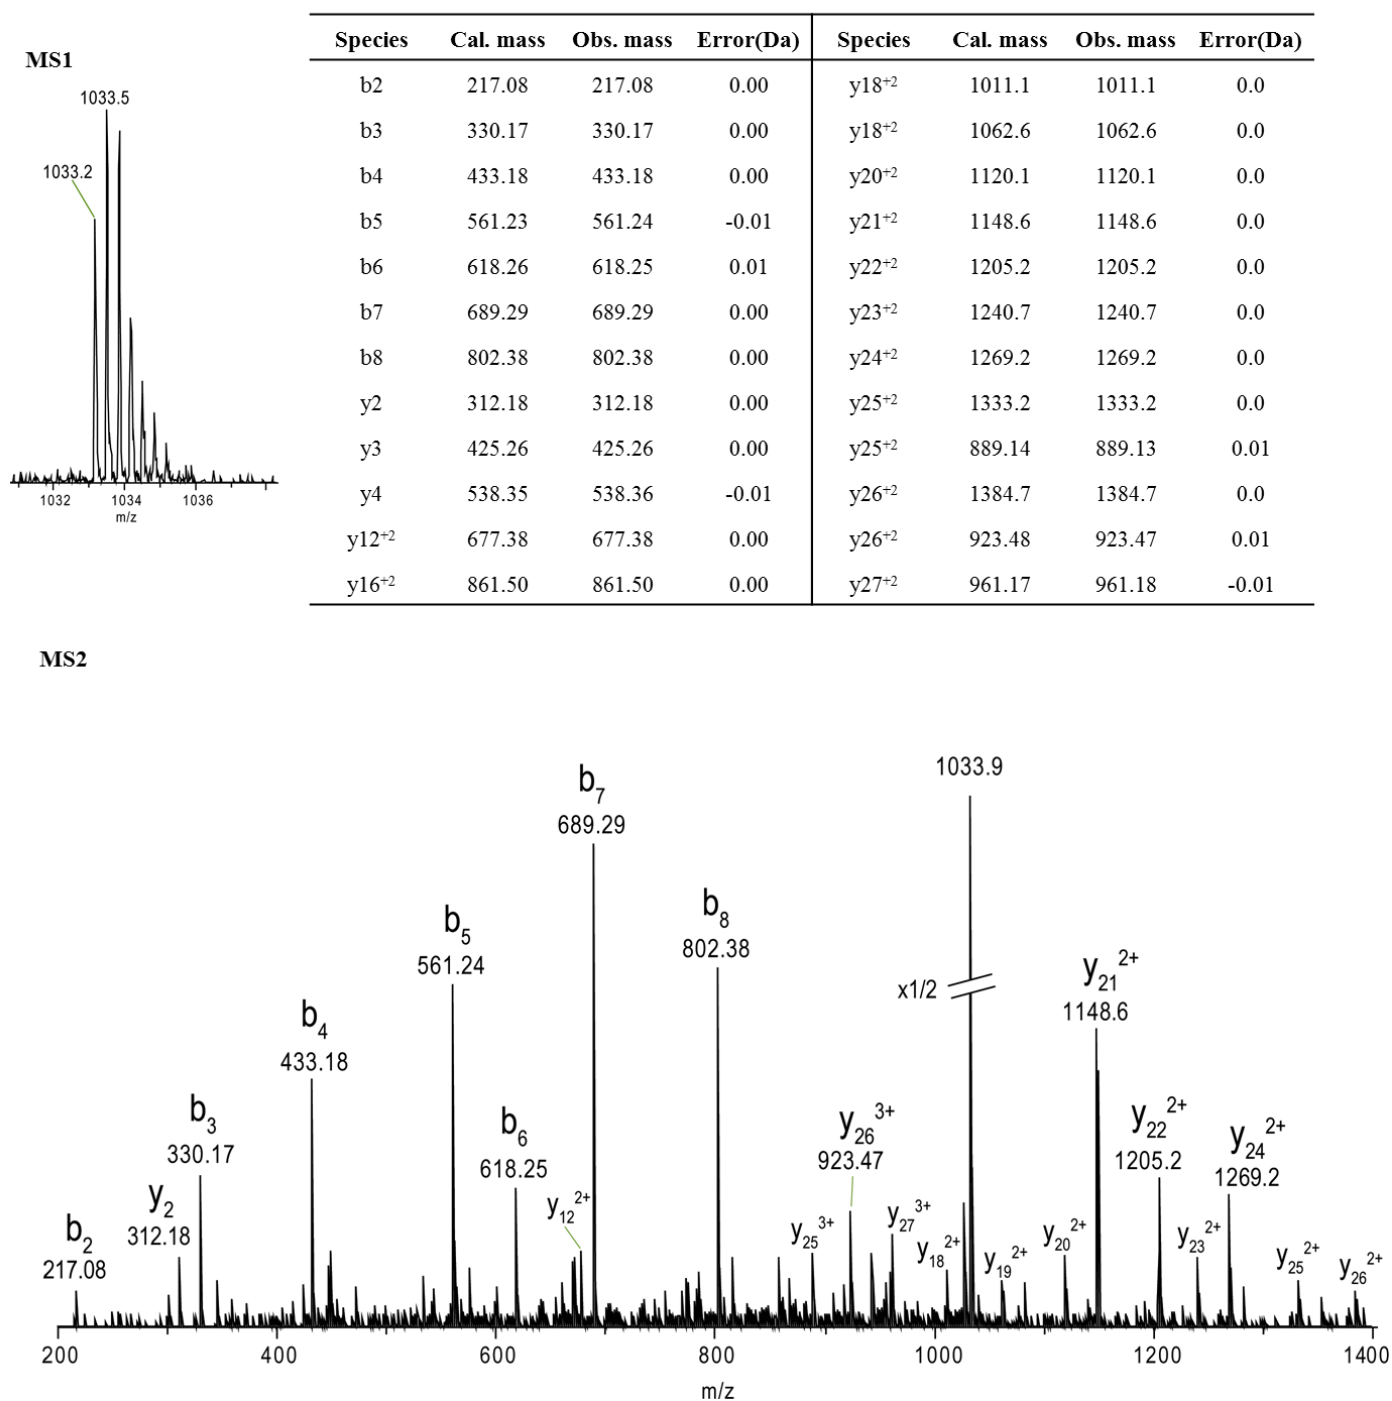

**Supplementary Fig. 4** | Identification of  $\mu$ I-II by MS/MS annotation with LC-HR-MS/MS (qTOF). B) MS/MS annotation of peptide TDICQGALGDCWLLAAIASLTLNDTLLHR ( $m/z=1033.2$ , +3 charge).

**A.**

AA sequence coverage of  $\mu$ I-IIC115A :

GSSHHHHHSSGLVPRGSHMASMTGGQQMGRGSGRHENAIAIKYLGQDYEQLRVRCLQSGTLFRDEAFPPVPQSLGYKDLGP  
 NSSKTYGIKWKRPTELLSNPQFIVDGATRDTICQGALGDA(115)WLLAAIASLTLNDTLLHRVVPHGQSFQNGYAGIFHFQLW  
 QFGEWVDVVDDLLPIKDGKLVFVHSAEGNEFWSALLEKAYAKVNGSYEALSGGSTSEGFEDFTGGVTEWYELRKAPSDL  
 YQIILKALERGSLGCSIDISSVLDMEAITFKKLVKGHAYSVTGAKQVNYRGQVVSILRMRNPWGEVEWTGAWSDSSEWN  
 NVDPYERDQLRVKMEDGEFWMSFRDFMREFTRLEICNLTPDLDKLAAALEHHHHHHH

| Start | End | Amino acid sequence                        | Charge | Cal. Mass | Obs. Mass | Error(Da) |
|-------|-----|--------------------------------------------|--------|-----------|-----------|-----------|
| 17    | 31  | (R)GSHMASMTGGQQMGR(G)                      | 3      | 512.56    | 512.56    | 0.00      |
| 17    | 31  | (R)GSHMASMTGGQQMGR(G)                      | 2      | 768.33    | 768.34    | -0.01     |
| 42    | 51  | (K)YLGQDYEQLR(V)                           | 2      | 642.82    | 642.82    | 0.00      |
| 54    | 62  | (R)CLQSGTLFR(D)                            | 2      | 512.77    | 512.76    | 0.01      |
| 63    | 76  | (R)DEAFPPVPQSLGYK(D)                       | 3      | 516.60    | 516.60    | 0.00      |
| 63    | 76  | (R)DEAFPPVPQSLGYK(D)                       | 2      | 774.39    | 774.39    | 0.00      |
| 77    | 84  | (K)DLGPNSSK(T)                             | 2      | 409.21    | 409.21    | 0.00      |
| 85    | 89  | (K)TYGIK(W)                                | 2      | 291.17    | 291.17    | 0.00      |
| 85    | 89  | (K)TYGIK(W)                                | 1      | 581.33    | 581.33    | 0.00      |
| 92    | 109 | (K)RPTELLSNPQFIVDGATR(T)                   | 3      | 672.03    | 672.03    | 0.00      |
| 92    | 109 | (K)RPTELLSNPQFIVDGATR(T)                   | 2      | 1007.5    | 1007.5    | 0.0       |
| 110   | 138 | (R)TDICQGALGDAWLLAAIASLTLNDTLLHR(V)        | 3      | 1022.5    | 1022.5    | 0.0       |
| 139   | 176 | (R)VPHGQSFQNGYAGIFHFQLWQFGEWVDVVDDLLPIK(D) | 4      | 1097.1    | 1097.1    | 0.0       |
| 180   | 198 | (K)LVFVHSAEGNEFWSALLEK(A)                  | 3      | 726.04    | 726.04    | 0.00      |
| 203   | 233 | (K)VNGSYEALSGGSTSEGFEDFTGGVTEWYELR(K)      | 4      | 836.88    | 836.93    | -0.05     |
| 203   | 233 | (K)VNGSYEALSGGSTSEGFEDFTGGVTEWYELR(K)      | 3      | 1115.5    | 1115.5    | 0.0       |
| 235   | 245 | (K)APSDLYQIILK(A)                          | 2      | 630.86    | 630.87    | -0.01     |
| 250   | 271 | (R)GSLGCSIDISSVLDMEAITFK(K)                | 3      | 767.06    | 767.06    | 0.00      |
| 291   | 298 | (R)GQVVSILIR(M)                            | 2      | 436.27    | 436.28    | 0.00      |
| 301   | 327 | (R)NPWGEVEWTGAWSDSSEWNNVDPYER(D)           | 4      | 800.09    | 800.10    | -0.01     |
| 301   | 327 | (R)NPWGEVEWTGAWSDSSEWNNVDPYER(D)           | 3      | 1066.5    | 1066.5    | 0.0       |
| 334   | 344 | (K)MEDGEFWMSFR(D)                          | 2      | 717.80    | 717.80    | 0.00      |
| 345   | 348 | (R)DFMR(E)                                 | 1      | 568.26    | 568.25    | 0.01      |
| 353   | 364 | (R)LEICNLTPDLDK(L)                         | 2      | 687.35    | 687.36    | -0.01     |

**Supplementary Fig. 5** | Identification of  $\mu$ I-IIC115A by MS/MS annotation with LC-HR-MS/MS (qTOF).

A) Amino acid sequence coverage of  $\mu$ I-IIC115A and m/z's of all tryptic peptides verified by MS<sup>2</sup>.



**B.**

TDICQGalGDAWLLAAIASLTLNDTLLHR

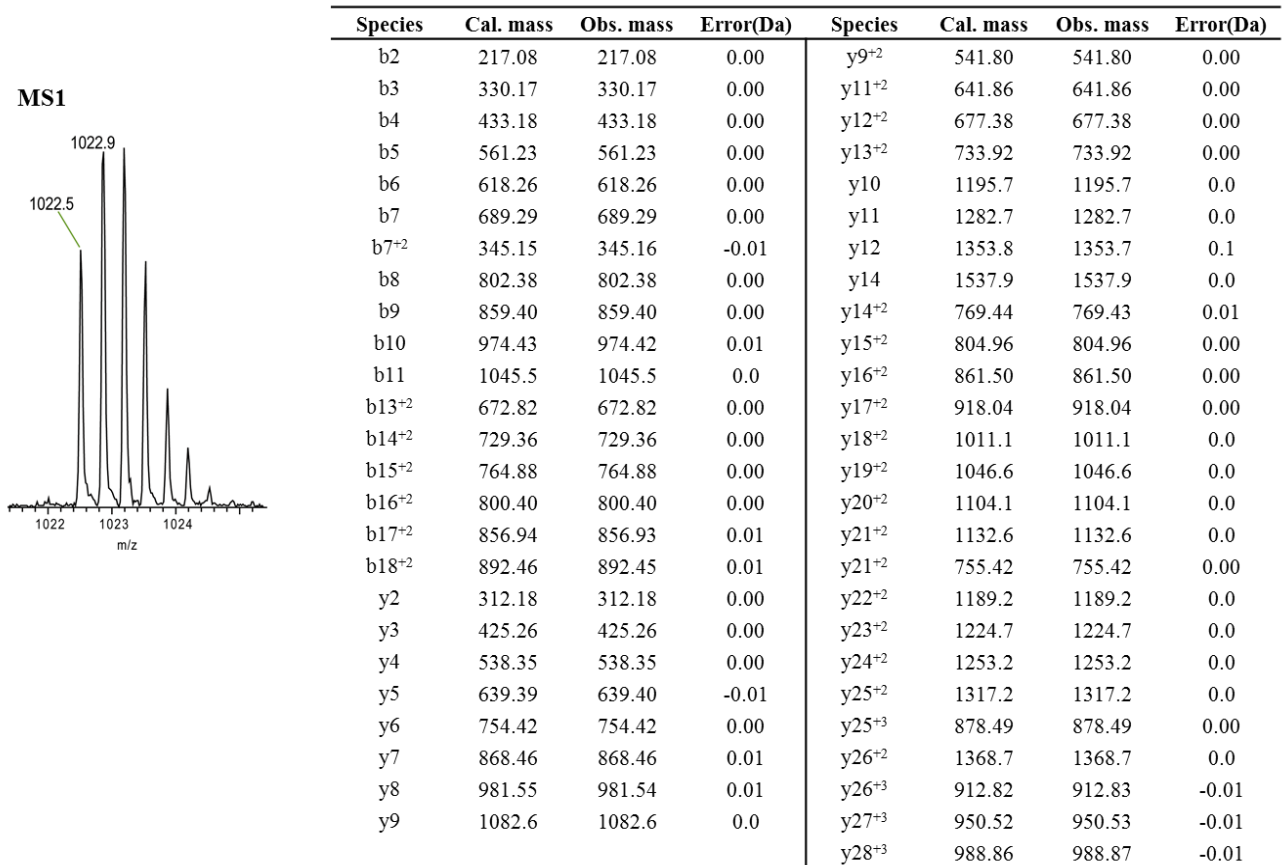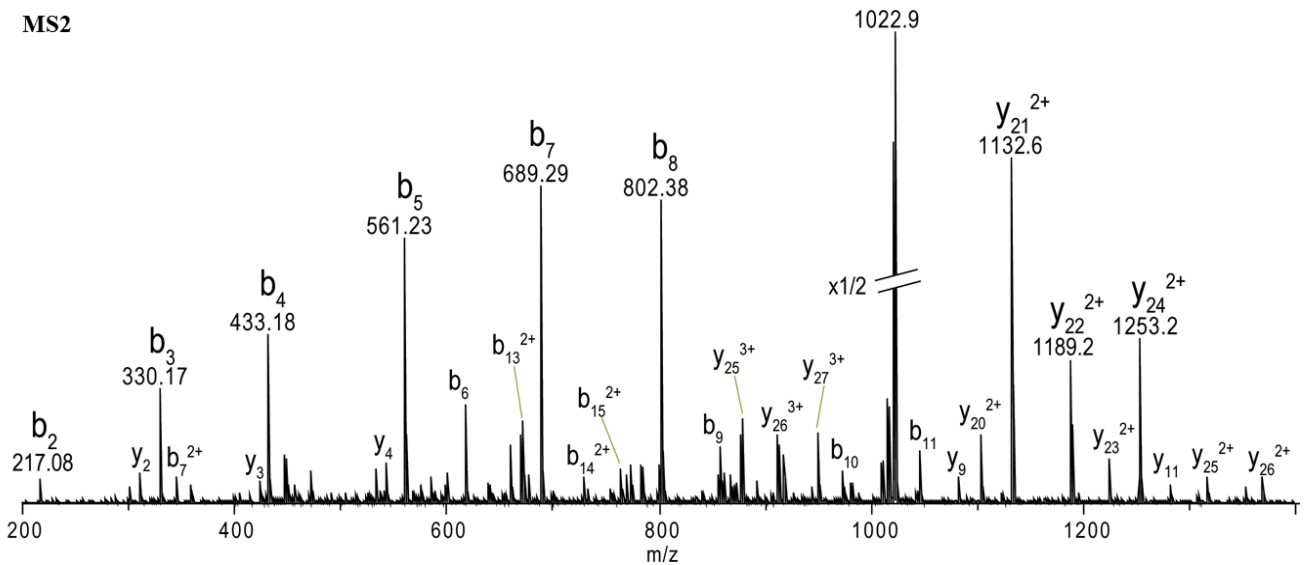

**Supplementary Fig. 5** | Identification of  $\mu$ IIC115A by MS/MS annotation with LC-HR-MS/MS (qTOF).

B) MS/MS annotation of peptide TDICQGalGDAWLLAAIASLTLNDTLLHR. ( $m/z = 1022.5$ , 3 charge).

A.

CLQSGTLFRDEAFPPVPQSLGYK

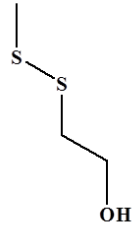

| Species                            | Cal. mass | Obs. mass | Error(Da) | Species           | Cal. mass | Obs. mass | Error(Da) |
|------------------------------------|-----------|-----------|-----------|-------------------|-----------|-----------|-----------|
| b2                                 | 293.099   | 293.099   | 0.000     | b20 <sup>+2</sup> | 1132.05   | 1132.05   | 0.00      |
| b3                                 | 421.157   | 421.156   | 0.001     | b22 <sup>+2</sup> | 1242.09   | 1242.10   | -0.01     |
| b4                                 | 508.189   | 508.189   | 0.000     | y3                | 367.198   | 367.197   | 0.001     |
| b5                                 | 565.211   | 565.211   | 0.000     | y4                | 480.282   | 480.280   | 0.002     |
| b6                                 | 666.259   | 666.260   | -0.001    | y5                | 567.314   | 567.313   | 0.001     |
| b7                                 | 779.343   | 779.337   | 0.004     | y7                | 792.425   | 792.425   | 0.000     |
| b8                                 | 926.411   | 926.408   | 0.003     | y7 <sup>+2</sup>  | 396.716   | 396.715   | 0.001     |
| b9                                 | 1082.51   | 1082.52   | -0.01     | y8                | 891.493   | 891.491   | 0.002     |
| b10 <sup>+2</sup>                  | 599.273   | 599.274   | -0.001    | y8 <sup>+2</sup>  | 446.250   | 446.251   | -0.001    |
| b11                                | 1326.58   | 1326.58   | 0.00      | y9                | 988.546   | 988.544   | 0.002     |
| b11 <sup>+2</sup>                  | 663.795   | 663.793   | 0.002     | y10               | 1085.60   | 1085.60   | 0.00      |
| b12                                | 1397.62   | 1397.61   | 0.01      | y10 <sup>+2</sup> | 543.303   | 543.303   | 0.000     |
| b12 <sup>+2</sup>                  | 699.313   | 699.316   | -0.003    | y11               | 1232.67   | 1232.67   | 0.00      |
| b12-H <sub>2</sub> O <sup>+2</sup> | 690.308   | 690.308   | 0.000     | y11 <sup>+2</sup> | 616.837   | 616.838   | -0.001    |
| b13                                | 1544.69   | 1544.68   | 0.01      | y12               | 1303.71   | 1303.71   | 0.00      |
| b13 <sup>+2</sup>                  | 772.847   | 772.848   | -0.001    | y12 <sup>+2</sup> | 652.356   | 652.360   | -0.004    |
| b13-H <sub>2</sub> O               | 1526.68   | 1526.68   | 0.00      | y15 <sup>+2</sup> | 852.441   | 852.437   | 0.004     |
| b13-H <sub>2</sub> O <sup>+2</sup> | 763.842   | 763.841   | 0.001     | y16 <sup>+2</sup> | 925.975   | 925.979   | -0.004    |
| b14 <sup>+2</sup>                  | 821.374   | 821.376   | -0.002    | y18 <sup>+2</sup> | 1033.04   | 1033.04   | 0.01      |
| b16 <sup>+2</sup>                  | 919.434   | 919.433   | 0.001     | y19 <sup>+2</sup> | 1061.55   | 1061.56   | -0.01     |
| b16-H <sub>2</sub> O <sup>+2</sup> | 910.429   | 910.425   | 0.004     | y20 <sup>+2</sup> | 1105.07   | 1105.07   | 0.00      |
| b18 <sup>+2</sup>                  | 1031.99   | 1031.98   | 0.01      | y21 <sup>+2</sup> | 1169.10   | 1169.10   | 0.00      |
| b19 <sup>+2</sup>                  | 1075.51   | 1075.50   | 0.01      | y21 <sup>+3</sup> | 779.734   | 779.730   | 0.004     |

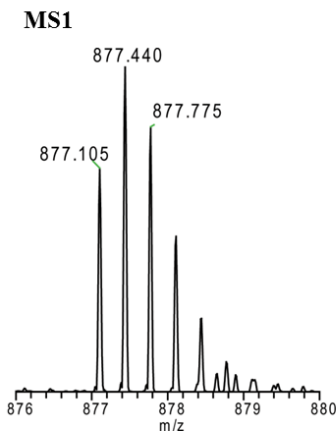

MS2

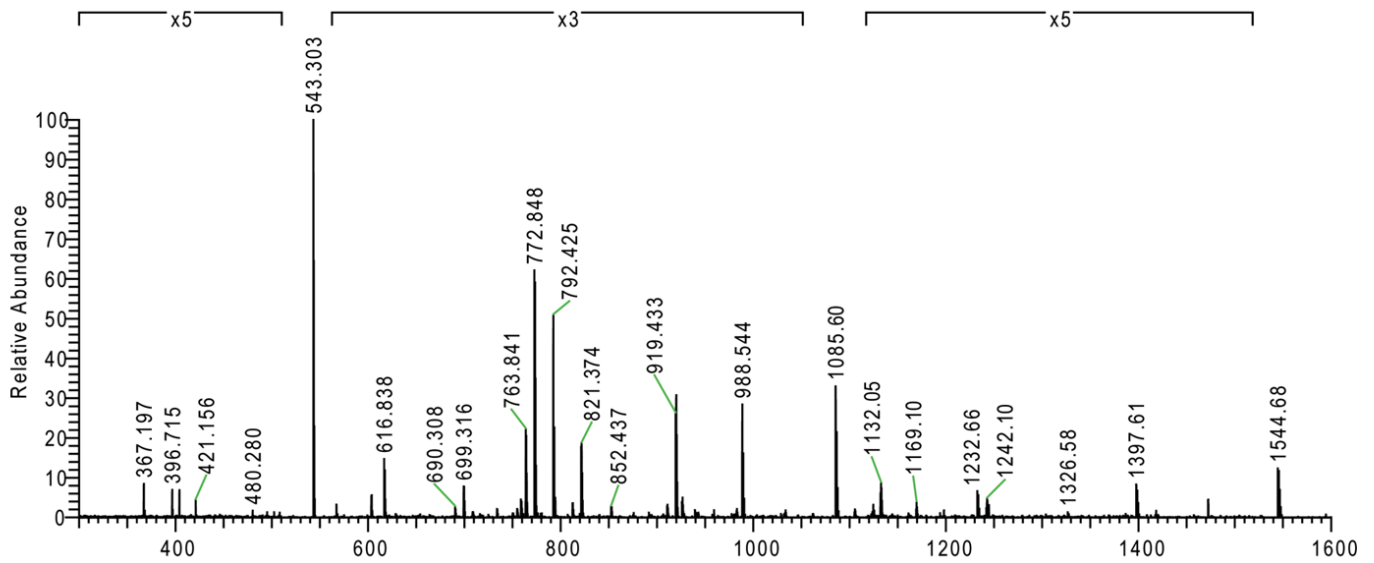

**Supplementary Fig. 6** | MS/MS annotation of  $\beta$ -ME modified peptides in  $\mu$ I-II by FT-ICR-MS. A) A  $\beta$ -ME modification (+75.9983 Da) occurs at Cys49 of the peptide CLQSGTLFRDEAFPPVPQSLGYK.

**B.**

TDICQGALGDCWLLAAIASLTLNDTLLHR

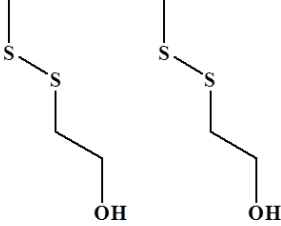

**MS1**

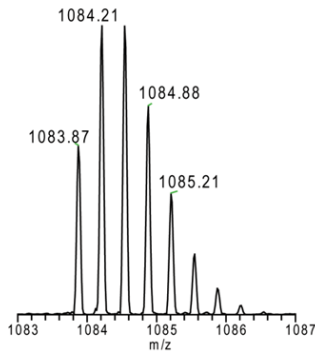

| Species                            | Cal. mass | Obs. mass | Error(Da) | Species                            | Cal. mass | Obs. mass | Error(Da) |
|------------------------------------|-----------|-----------|-----------|------------------------------------|-----------|-----------|-----------|
| b4                                 | 509.173   | 509.172   | 0.001     | y11                                | 1282.71   | 1282.71   | 0.00      |
| b4-H <sub>2</sub> O                | 491.163   | 491.162   | 0.001     | y12                                | 1353.75   | 1353.75   | 0.00      |
| b5                                 | 637.232   | 637.230   | 0.002     | y12 <sup>+2</sup>                  | 677.378   | 677.377   | 0.001     |
| b6                                 | 694.254   | 694.252   | 0.002     | y13                                | 1466.83   | 1466.84   | -0.01     |
| b6-H <sub>2</sub> O                | 676.243   | 676.242   | 0.001     | y14                                | 1537.87   | 1537.88   | -0.01     |
| b7                                 | 765.291   | 765.290   | 0.001     | y14 <sup>+2</sup>                  | 769.439   | 769.437   | 0.002     |
| b7-H <sub>2</sub> O                | 747.280   | 747.281   | -0.001    | y15                                | 1608.91   | 1608.92   | -0.01     |
| b8                                 | 878.375   | 878.377   | -0.002    | y15 <sup>+2</sup>                  | 804.957   | 804.958   | -0.001    |
| b8-H <sub>2</sub> O                | 860.364   | 860.368   | -0.004    | y16 <sup>+2</sup>                  | 861.499   | 861.502   | -0.003    |
| b9                                 | 935.396   | 935.402   | -0.006    | y17 <sup>+2</sup>                  | 918.041   | 918.042   | 0.001     |
| b9-H <sub>2</sub> O                | 917.386   | 917.386   | 0.000     | y18 <sup>+2</sup>                  | 1011.08   | 1011.08   | 0.00      |
| b10                                | 1050.42   | 1050.43   | -0.01     | y19 <sup>+2</sup>                  | 1100.59   | 1100.58   | 0.01      |
| b10-H <sub>2</sub> O               | 1032.41   | 1032.42   | -0.01     | y20 <sup>+2</sup>                  | 1158.10   | 1158.10   | 0.00      |
| b11                                | 1229.43   | 1229.43   | 0.00      | y20-H <sub>2</sub> O <sup>+2</sup> | 1149.09   | 1149.10   | -0.01     |
| b12                                | 1415.51   | 1415.51   | 0.00      | y21 <sup>+2</sup>                  | 1186.61   | 1186.61   | 0.00      |
| b13                                | 1528.59   | 1528.61   | -0.02     | y21-H <sub>2</sub> O <sup>+2</sup> | 1177.60   | 1177.61   | -0.01     |
| b13-H <sub>2</sub> O <sup>+3</sup> | 504.199   | 504.195   | 0.004     | y22 <sup>+2</sup>                  | 1243.15   | 1243.16   | -0.01     |
| b15                                | 1712.72   | 1712.74   | -0.02     | y23 <sup>+2</sup>                  | 1278.67   | 1278.67   | 0.00      |
| b16 <sup>+2</sup>                  | 892.380   | 892.383   | -0.003    | y24-H <sub>2</sub> O <sup>+2</sup> | 1298.18   | 1298.17   | 0.01      |
| b17                                | 1896.84   | 1896.84   | 0.00      | y25 <sup>+2</sup>                  | 1371.21   | 1371.22   | -0.01     |
| y3                                 | 425.262   | 425.261   | 0.001     | y25 <sup>+2</sup>                  | 914.475   | 914.477   | -0.002    |
| y4                                 | 538.346   | 538.347   | -0.001    | y25-H <sub>2</sub> O <sup>+2</sup> | 1362.20   | 1362.21   | -0.01     |
| y5                                 | 639.394   | 639.395   | -0.001    | y25-H <sub>2</sub> O <sup>+2</sup> | 908.472   | 908.473   | -0.001    |
| y6                                 | 754.421   | 754.425   | -0.004    | y26 <sup>+2</sup>                  | 1460.71   | 1460.71   | 0.00      |
| y6-H <sub>2</sub> O                | 736.410   | 736.410   | 0.000     | y26 <sup>+3</sup>                  | 974.145   | 974.143   | 0.002     |
| y7                                 | 868.464   | 868.468   | -0.004    | y26-H <sub>2</sub> O <sup>+2</sup> | 1451.71   | 1451.71   | 0.00      |
| y8                                 | 981.548   | 981.545   | 0.003     | y26-H <sub>2</sub> O <sup>+3</sup> | 968.141   | 968.148   | -0.007    |
| y9 <sup>+2</sup>                   | 541.801   | 541.801   | 0.000     | y27 <sup>+2</sup>                  | 1517.26   | 1517.24   | 0.02      |
| y9-H <sub>2</sub> O                | 1064.59   | 1064.58   | 0.01      | y27 <sup>+3</sup>                  | 1011.84   | 1011.84   | 0.00      |
| y10                                | 1195.68   | 1195.68   | 0.00      | y27-H <sub>2</sub> O <sup>+3</sup> | 1005.84   | 1005.84   | 0.00      |

**MS2**

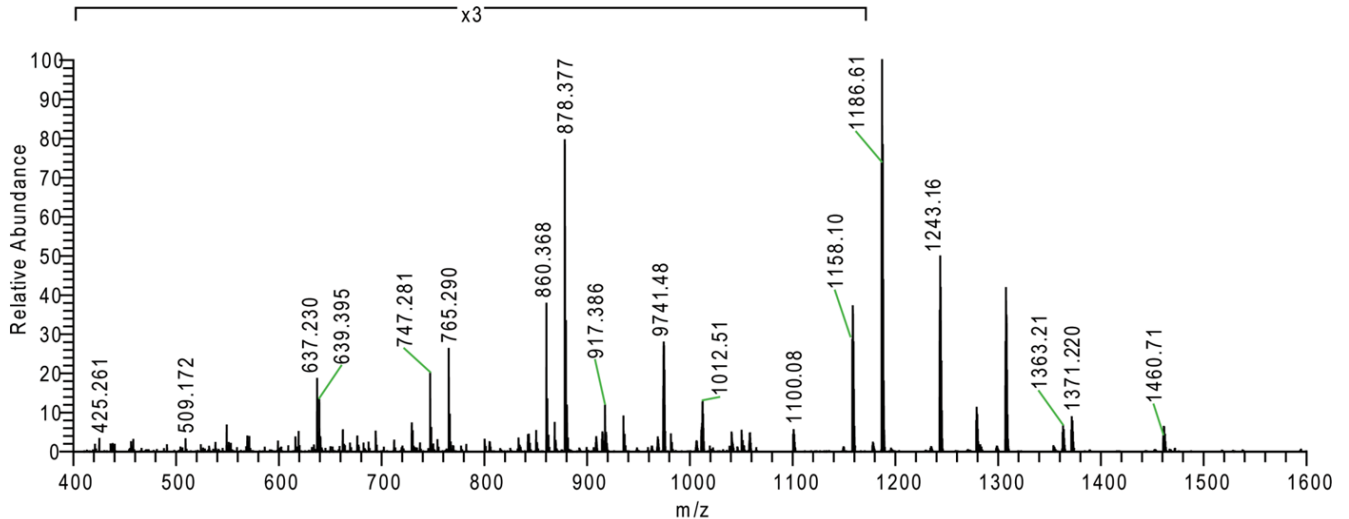

**Supplementary Fig. 6** | MS/MS annotation of  $\beta$ -ME modified peptides in  $\mu$ I-II by FT-ICR-MS. B)  $\beta$ -ME modifications (+75.9983 Da) occur at Cys108 and Cys115 of the peptide TDICQGALGDCWLLAAIASLTLNDTLLHR.

A.

### $\mu\text{I-II}$

Calculated exact mass: 42467.9 Da, Observed exact mass: 42467.9 Da, Error: 0.0 Da

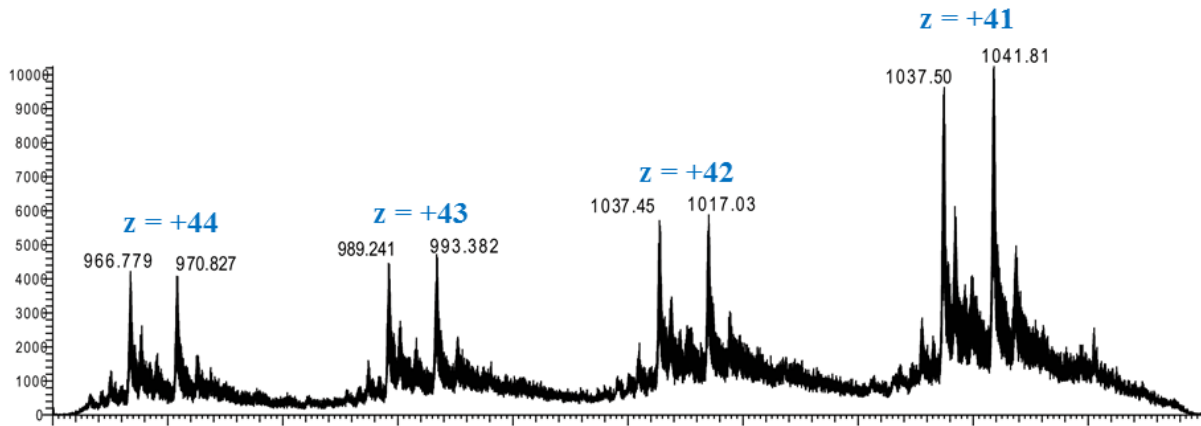

### $\mu\text{I-II} + 1$ (shifted by 881.5 Da)

Calculated exact mass: 43349.4 Da, Observed exact mass: 43349.4 Da, Error: 0.0 Da

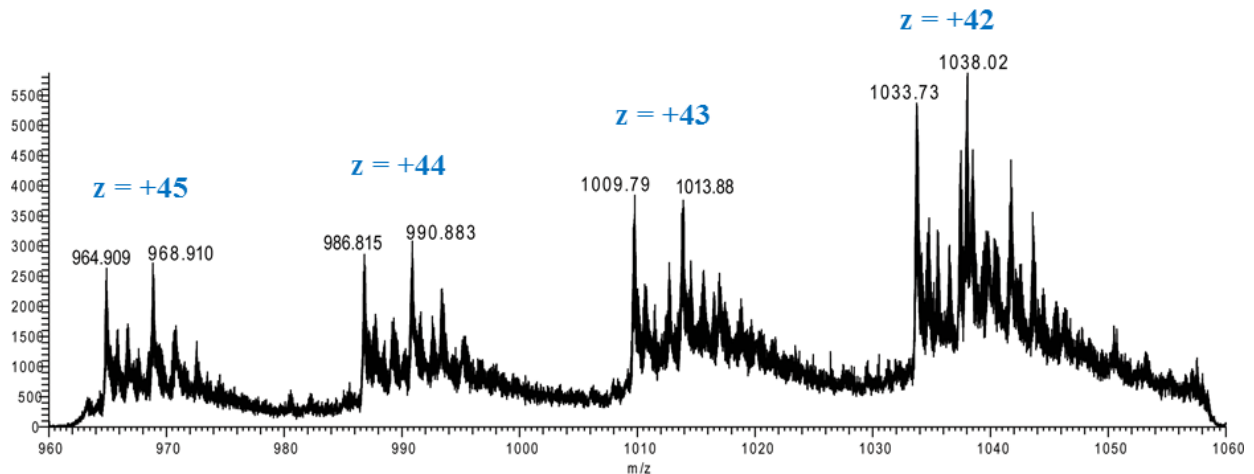

**Supplementary Fig. 7** | FT-MS data comparison of  $\mu\text{I-II}$  and  $\mu\text{I-II} + 1$  samples. A)  $\mu\text{I-II}$  and  $\mu\text{I-II} + 1$  sample. A shift of 881.5 was observed in  $\mu\text{I-II} + 1$  sample. The calculated exact mass of  $\mu\text{I-II}$  includes 3  $\beta$ -ME adducts (75.9983 Da each). The calculated exact mass of  $\mu\text{I-II} + 1$  includes 2  $\beta$ -ME adducts and the mass of **1** (957.5423 Da).

**B.**

**$\mu$ I-IIC115A**

Calculated exact mass: 42359.9 Da, Observed exact mass: 42360.1 Da, Error: -0.2 Da

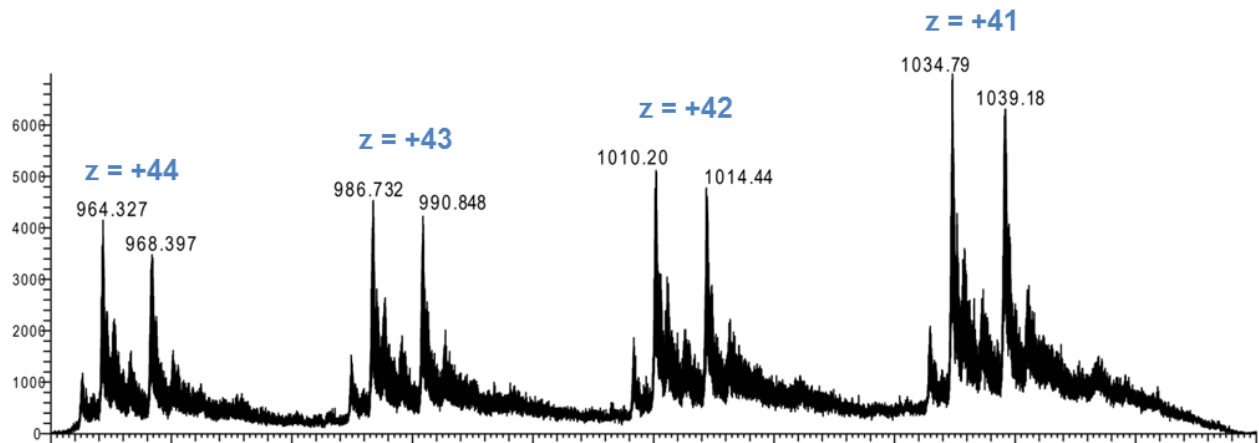

**$\mu$ I-IIC115A + 1 (no shift)**

Calculated exact mass: 42359.9 Da, Observed exact mass: 42360.1 Da, Error: -0.2 Da

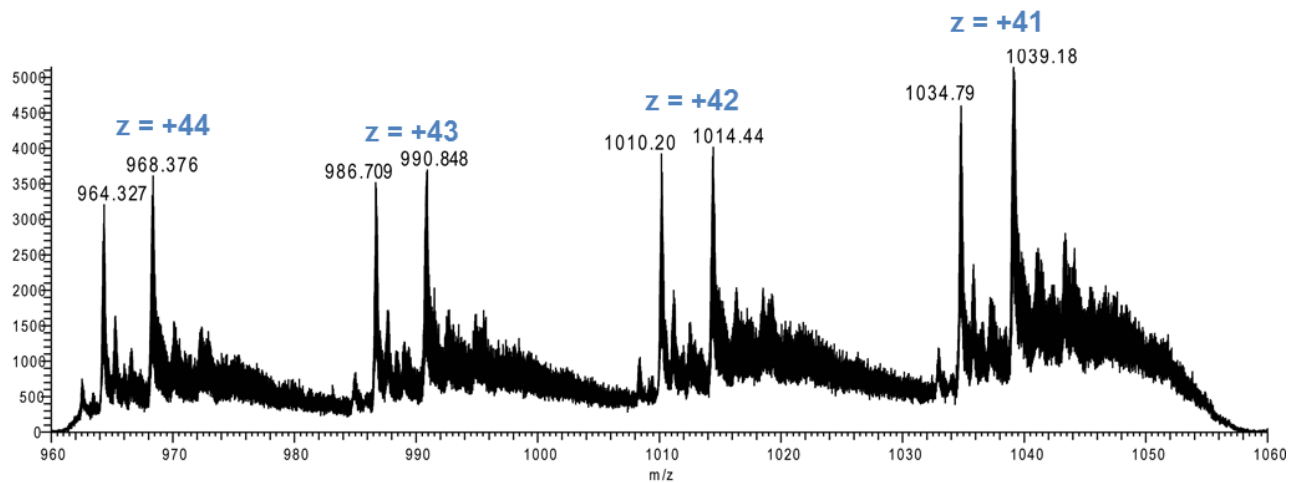

**Supplementary Fig. 7** | FT-MS data comparison of  $\mu$ I-II and  $\mu$ I-IIC115A samples. B)  $\mu$ I-IIC115A and  $\mu$ I-IIC115A + 1 sample. No shift was observed in  $\mu$ I-IIC115A + 1 sample. The calculated exact masses of  $\mu$ I-IIC115A and  $\mu$ I-IIC115A + 1 both include 2  $\beta$ -ME adducts (75.9983 Da each).

T D I C Q G A L G D C W L L A A I A S L T L N D T L L H R

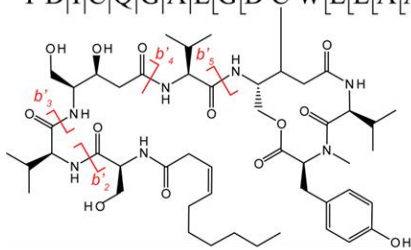

MS1

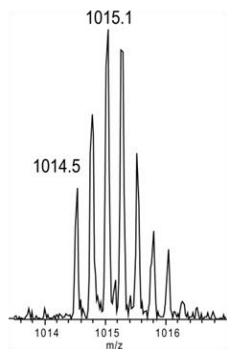

| Species          | Obs. mass | Cal. mass | Error(Da) | Species                                | Obs. mass | Cal. mass | Error(Da) |
|------------------|-----------|-----------|-----------|----------------------------------------|-----------|-----------|-----------|
| b2               | 217.08    | 217.08    | 0.00      | y11                                    | 1282.7    | 1282.7    | 0.0       |
| b3               | 330.17    | 330.17    | 0.00      | y11 <sup>2+</sup>                      | 641.86    | 641.85    | 0.01      |
| b4               | 433.18    | 433.17    | 0.01      | y12 <sup>2+</sup>                      | 677.38    | 677.38    | 0.00      |
| b5               | 561.23    | 561.24    | -0.01     | y13 <sup>2+</sup>                      | 733.92    | 733.92    | 0.00      |
| b6               | 618.26    | 618.26    | 0.00      | y14 <sup>2+</sup>                      | 769.44    | 769.44    | 0.00      |
| b7               | 689.29    | 689.29    | 0.00      | y15 <sup>2+</sup>                      | 804.96    | 804.96    | 0.00      |
| b8               | 802.38    | 802.38    | 0.00      | y16 <sup>2+</sup>                      | 861.50    | 861.50    | 0.00      |
| b9               | 859.40    | 859.40    | 0.00      | y17 <sup>2+</sup>                      | 918.04    | 918.04    | 0.00      |
| y2               | 312.18    | 312.18    | 0.00      | y21 <sup>3+</sup>                      | 1085.3    | 1085.3    | 0.0       |
| y3               | 425.26    | 425.26    | 0.00      | y22 <sup>3+</sup>                      | 1123.0    | 1123.0    | 0.0       |
| y4               | 538.35    | 538.34    | 0.01      | b'2                                    | 240.16    | 240.16    | 0.00      |
| y5               | 639.39    | 639.39    | 0.00      | b'3                                    | 339.23    | 339.23    | 0.00      |
| y5 <sup>2+</sup> | 320.20    | 320.21    | -0.01     | b'4                                    | 470.29    | 470.29    | 0.00      |
| y6               | 754.42    | 754.42    | 0.00      | b'5                                    | 569.35    | 569.35    | 0.00      |
| y6 <sup>2+</sup> | 377.71    | 377.70    | 0.01      | [M+4H <sup>+</sup> ]-b'3 <sup>4+</sup> | 929.98    | 929.97    | 0.01      |
| y7               | 868.46    | 868.47    | -0.01     | [M+4H <sup>+</sup> ]-b'2 <sup>4+</sup> | 954.75    | 954.74    | 0.01      |
| y8               | 981.55    | 981.54    | 0.01      | [M+3H <sup>+</sup> ]-b'5 <sup>3+</sup> | 1162.9    | 1162.9    | 0.0       |
| y9               | 1082.6    | 1082.6    | 0.0       | [M+3H <sup>+</sup> ]-b'3 <sup>3+</sup> | 1239.6    | 1239.7    | -0.1      |
| y10              | 1195.7    | 1195.7    | 0.0       |                                        |           |           |           |

MS2

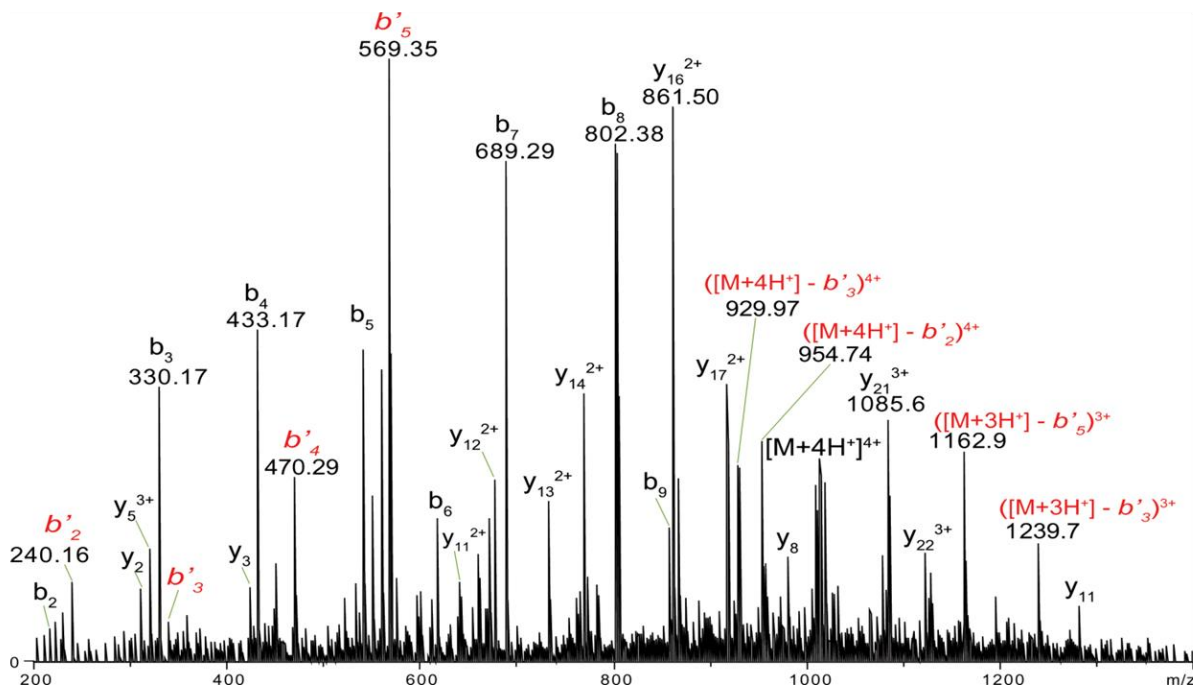

**Supplementary Fig. 8** | MS/MS annotation of 1-modified peptide by Q-TOF ( $m/z=1014.5, +4$ ). B ions of 1 were labeled by b' and red color.

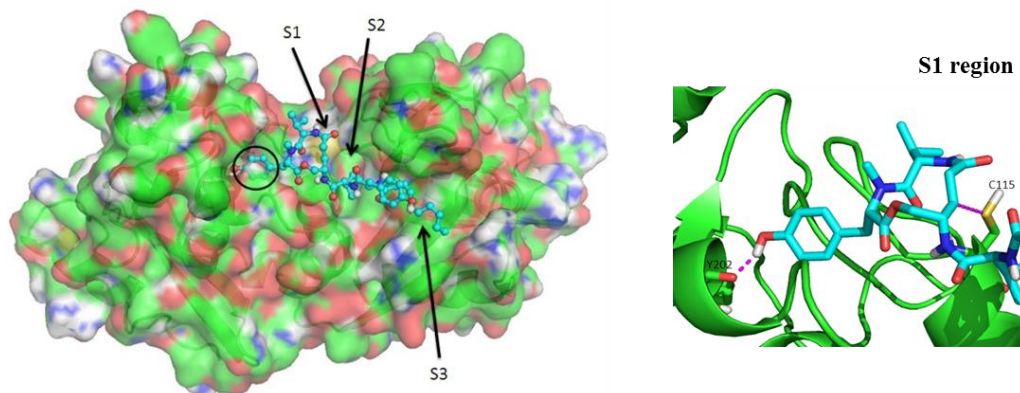

**Supplementary Fig. 9** | Representative pose of **4** (thalassospiramide C) in the calpain model. The lowest energy binding conformation of **4** shows the best pose to S1, S2 and S3 position of calpain in the model. The double bond in the ring has a short distance to Cys115 and the phenol group forms a hydrogen bond with Y202 (the enlarged view of S1 region shown on the right).

### ESI-TOF-HRMS

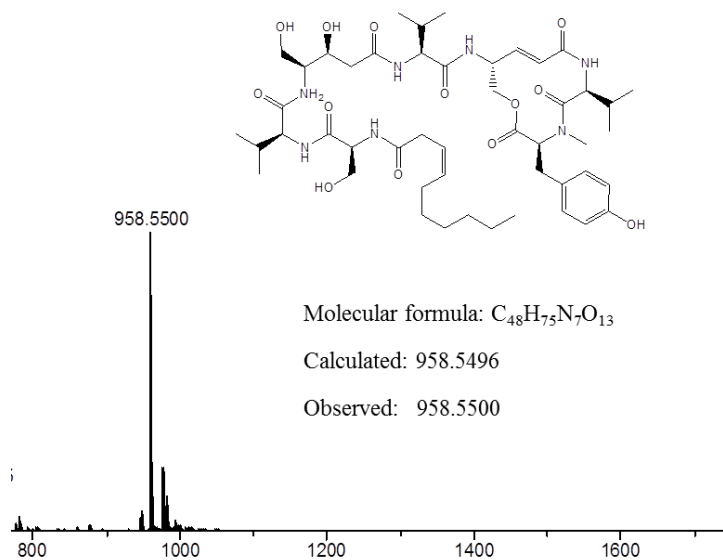

### <sup>1</sup>H NMR

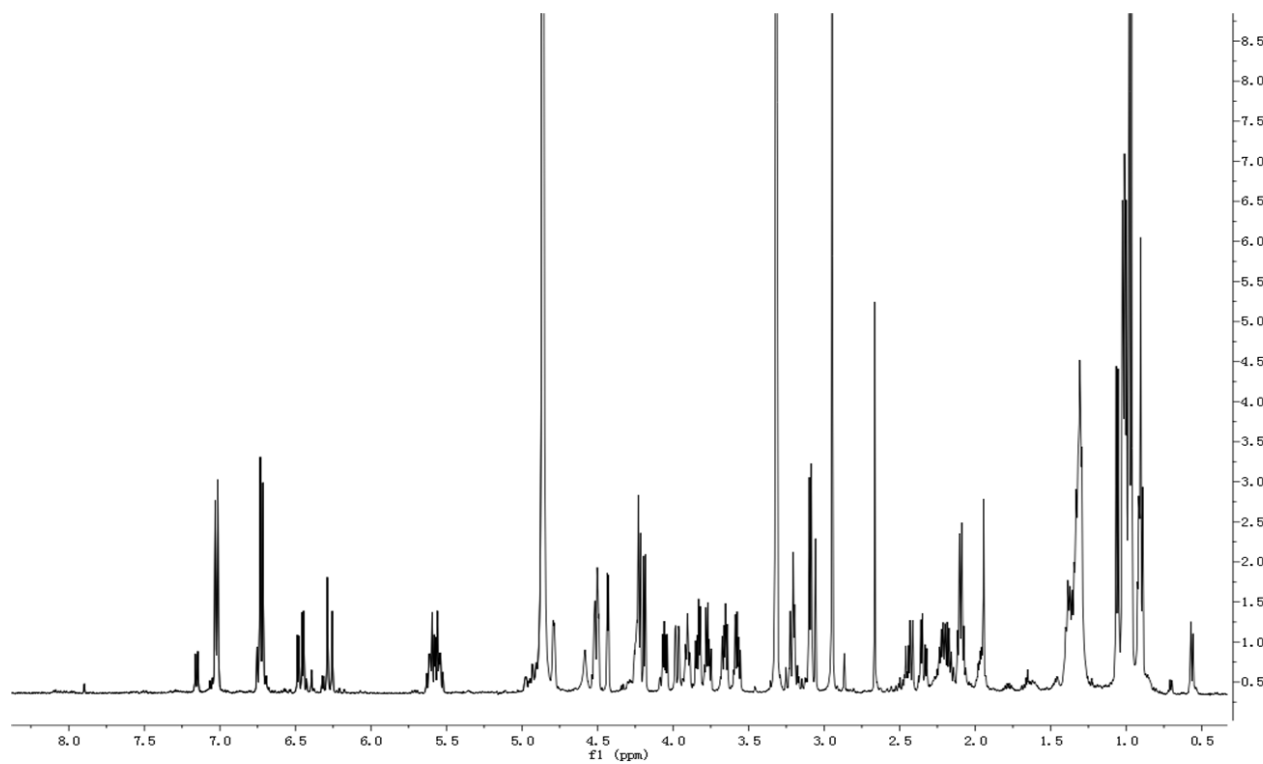

Supplementary Fig. 10 | Characterization of 1 by HRMS and <sup>1</sup>H NMR (in methanol-*d*<sub>4</sub>).



MS<sup>1</sup> (ESI-TOF-HRMS)

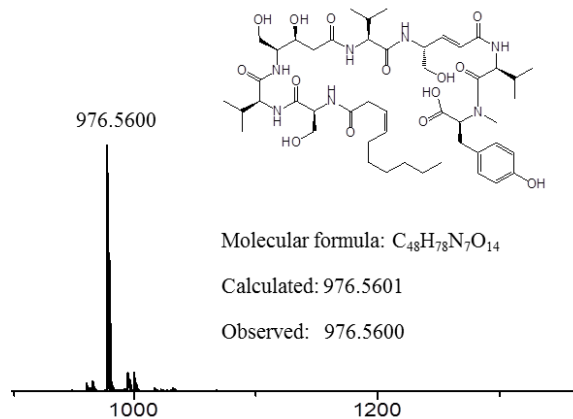

MS<sup>3</sup> (781.39 m/z)

| Species | Cal. mass | Obs. mass | Error (Da) |
|---------|-----------|-----------|------------|
| b4      | 470.29    | 470.42    | -0.13      |
| b5      | 569.36    | 569.30    | 0.06       |
| b6      | 682.40    | 682.43    | -0.03      |
| y3      | 312.18    | 312.23    | -0.05      |
| y4      | 443.24    | 443.22    | 0.02       |
| y5      | 542.31    | 542.28    | 0.03       |
| y6      | 629.34    | 629.44    | -0.10      |

MS<sup>2</sup> (976.56 m/z)

| Species | Cal. mass | Obs. mass | Error (Da) |
|---------|-----------|-----------|------------|
| b3(-18) | 321.23    | 321.18    | 0.05       |
| b4      | 470.29    | 470.21    | 0.08       |
| b5      | 569.36    | 569.22    | 0.14       |
| b6      | 682.40    | 682.37    | 0.03       |
| b7      | 781.47    | 781.38    | 0.09       |
| y3      | 408.20    | 408.20    | 0.00       |
| y4      | 507.27    | 507.30    | -0.03      |
| y5      | 638.32    | 638.35    | -0.03      |

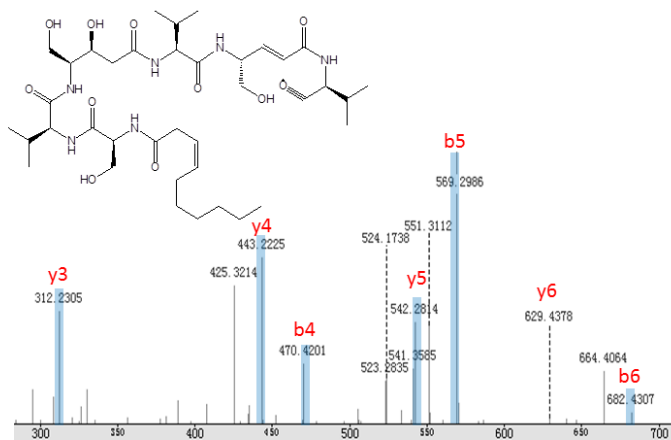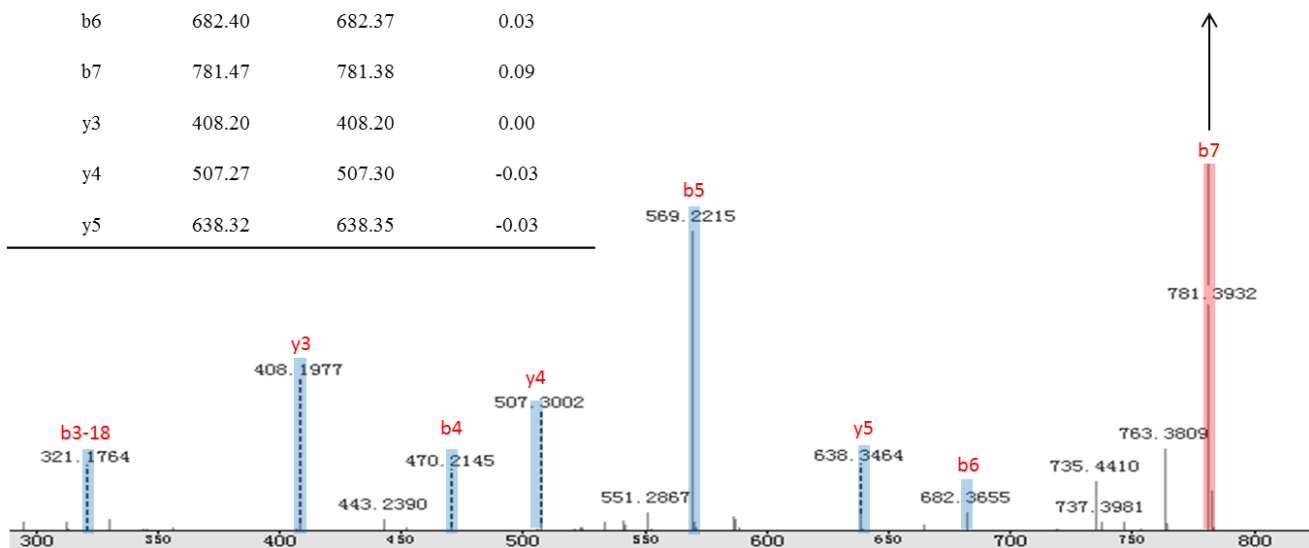

Supplementary Fig. 11 | Characterization of **2** by HRMS and MS<sup>n</sup>.

## ESI-TOF-MS

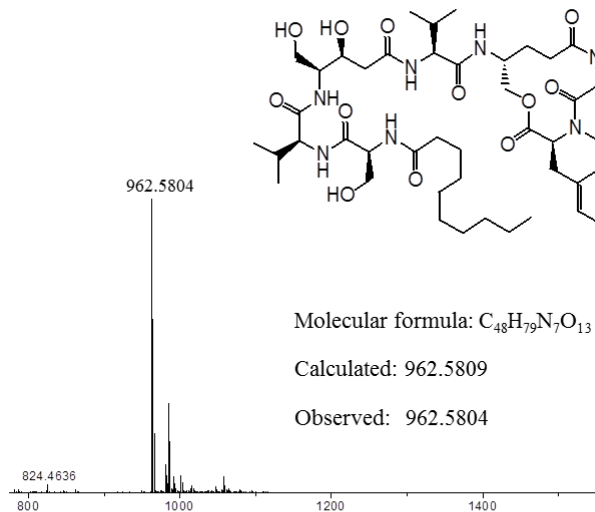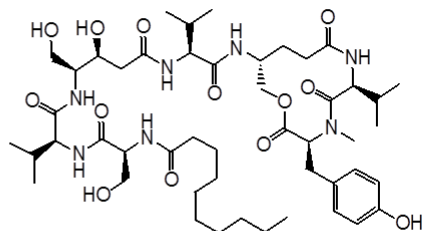

| Species | Cal. mass | Obs. mass | Error (Da) |
|---------|-----------|-----------|------------|
| b2      | 242.18    | 242.27    | -0.09      |
| b3      | 341.24    | 341.24    | 0.00       |
| b4      | 472.28    | 472.30    | -0.02      |
| b5      | 571.37    | 571.35    | 0.02       |
| y2      | 392.20    | 392.21    | -0.01      |
| y3      | 491.27    | 491.27    | 0.00       |
| y4      | 622.33    | 622.33    | 0.00       |
| y5      | 721.40    | 721.40    | 0.00       |

## MS2 – 962.58 m/z

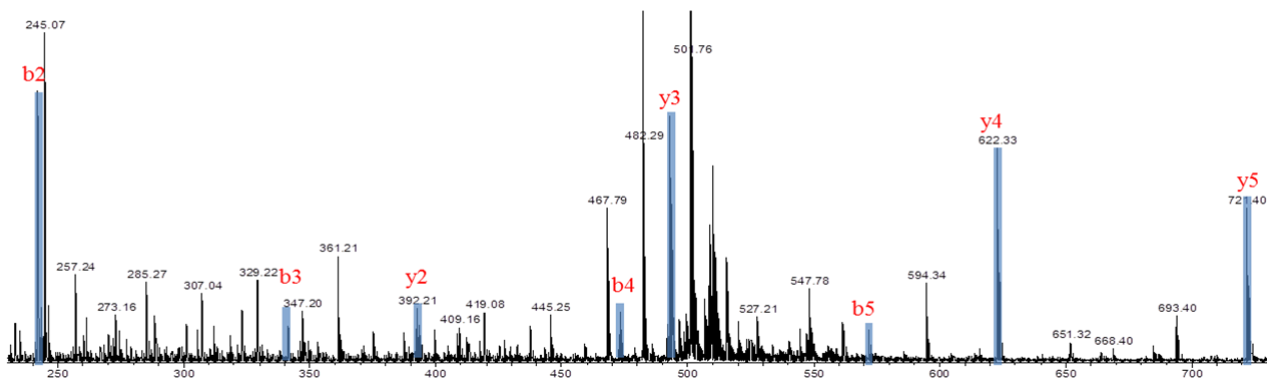

**Supplementary Fig. 12** | Characterization of **3** by HRMS and MS<sup>n</sup>.

## ESI-TOF-HRMS

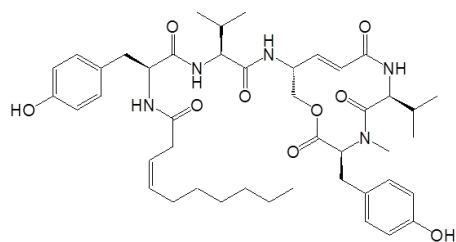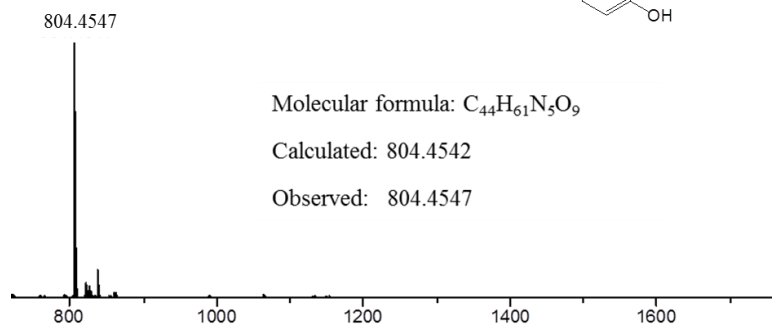

## $^1H$ NMR

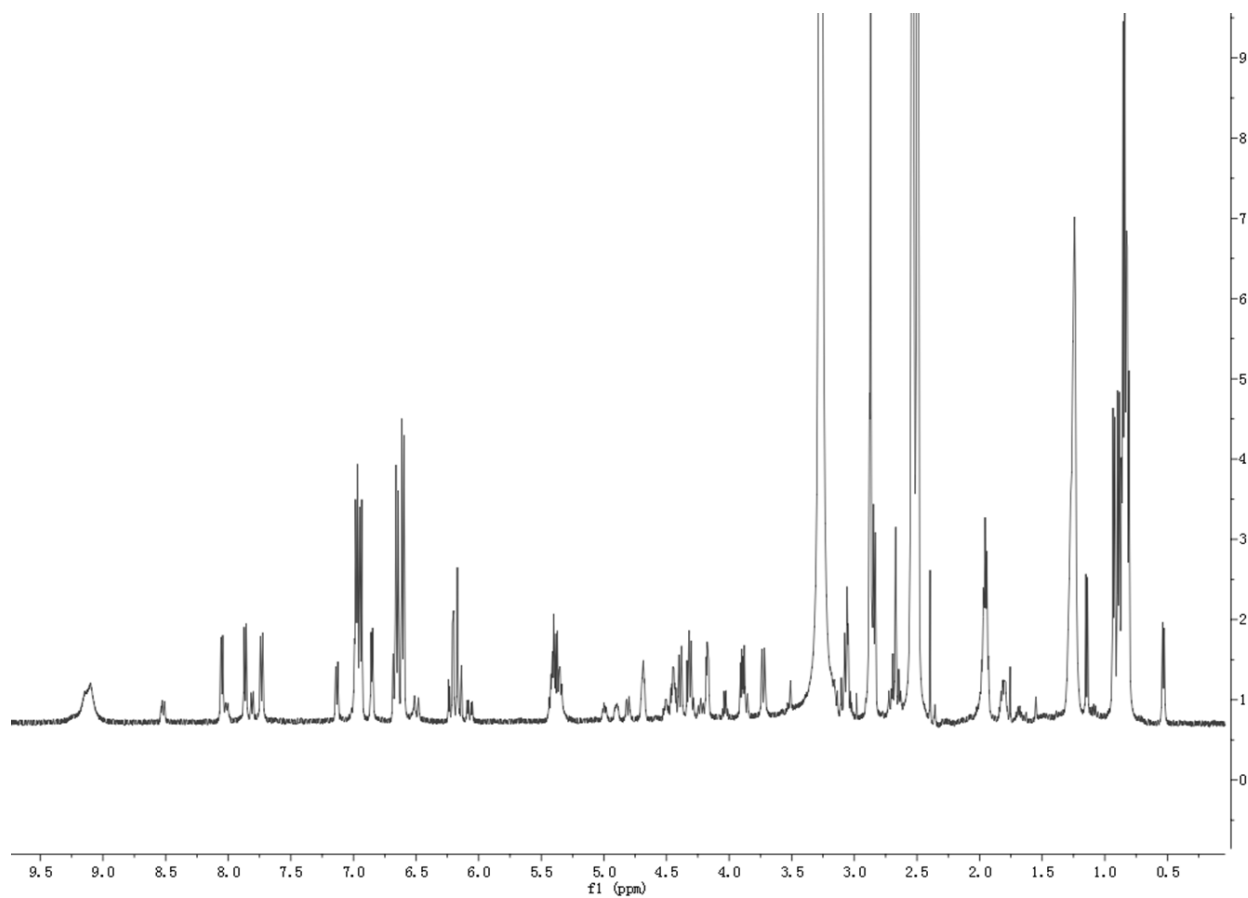

Supplementary Fig. 13 | Characterization of **4** by HRMS and  $^1H$  NMR (in methanol- $d_4$ ).

## Supplementary Tables

**Supplementary Table 1: Docking results for the representative thalassospiramides.**

| Compound             | Minimum warhead distance (Å) | Number of docking poses with distance <sup>[a]</sup> < 5 Å | Minimum AutoDock score (kcal/mol) | IC <sub>50</sub> (nM) |
|----------------------|------------------------------|------------------------------------------------------------|-----------------------------------|-----------------------|
| Thalassospiramide A  | 4.29                         | 2                                                          | -6.2                              | 57                    |
| Thalassospiramide A1 | 3.98                         | 5                                                          | -7.3                              | 42                    |
| Thalassospiramide A5 | 4.95                         | 3                                                          | -7                                | 22                    |
| Thalassospiramide D  | 4.64                         | 3                                                          | -7.4                              | 21                    |
| Thalassospiramide D1 | 3.7                          | 8                                                          | -6.8                              | 35                    |
| Thalassospiramide B  | 3.98                         | 10                                                         | -6.8                              | 29                    |
| Thalassospiramide C  | 3.39                         | 20                                                         | -8.1                              | 3                     |
| Thalassospiramide E1 | 3.60                         | 6                                                          | -7.6                              | 21                    |

**[a]: the distance between warhead carbon and active site sulfur.**
